# Supplementary material
Source: PubMed Central journal article supplement (PMC3173087)
Supplement: supp_M111.251173_jbc.M111.251173-1.pdf [file supp_M111.251173_jbc.M111.251173-1.pdf]

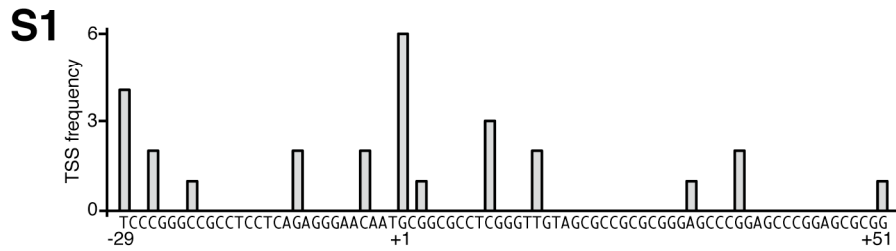

**Fig. S1.** Dispersed transcriptional start sites of GnT-IX gene. 5'-RACE was performed using 5'-Full RACE Core Set (TAKARA) and total RNA from 20-week-old mouse brain. For synthesis of 1st strand cDNA, we used 5'-phosphorylated primer (5'-CCCATCTGGGTTGAC). After circularization of the cDNA, nested PCR was performed, and then the product was cloned and sequenced. Primers for the 1st PCR, TTCGTGGTTCCCAGAGCGGT and CTCCCCGATTACATTTTGG, for the 2nd PCR, GCTTCTCGCCAGACAAGTT and TCTGCCTGCTAGGCTCGCTG. GnT-IX mRNA transcription is initiated at several genomic sites which is often seen for a vertebrate TATA-less dispersed core promoter. Totally, 30 clones were sequenced, and 27 out of 30 mRNAs were initiated in this region (from -29 to +51). One of major TSS was designated as +1.

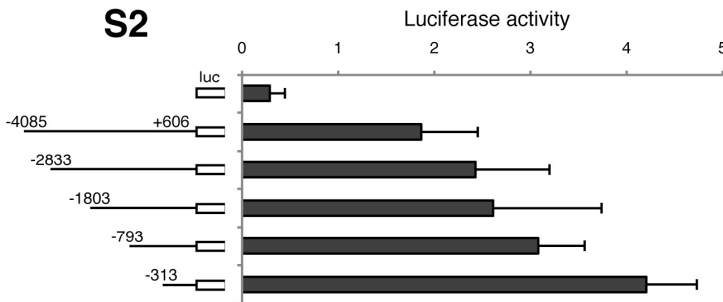

**Fig. S2.** Promoter activity of GnT-IX gene in Neuro2A cells. Activity of mouse GnT-IX P1 was analyzed by luciferase reporter assay in Neuro2A cells. Relative luciferase activities against internal control Renilla luciferase are shown as the mean  $\pm$  S. E. (n=3). Promoter regions analyzed are shown to the left of the graph. There are no apparent enhancer elements in this region.

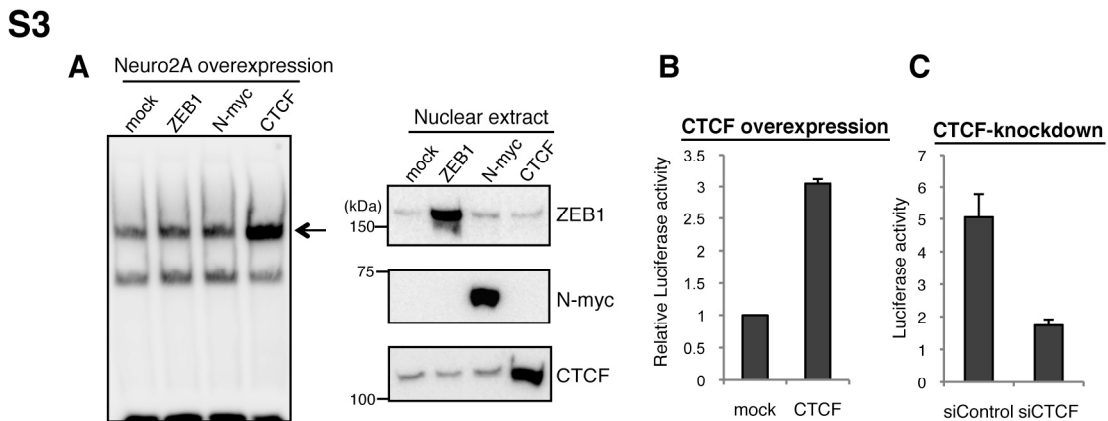

**Fig. S3.** Binding of CTCTF activates GnT-IX promoter. (A) EMSA was performed using a biotinylated oligoDNA probe (from -82 to -44 in P1). Nuclear extracts of Neuro2A cells transfected with pcDNA6 (mock), ZEB1, N-myc or CTCTF expression plasmid were used. An arrow indicates increased CTCTF signal after overexpression. Overexpression of each factor was confirmed by western blotting using the same nuclear extracts with anti-ZEB1, anti-N-myc and anti-CTCTF antibodies (right). (B, C) Neuro2A cells were transfected with part of the mouse P1 construct (-313 to +606) inserted into a luciferase vector. Luciferase activity was then measured after overexpression (B) or knockdown (C) of CTCTF. For overexpression, CTCTF expression vector or pcDNA6 (mock) was co-transfected with reporter plasmids. Relative luciferase activity against mock sample is shown as the mean  $\pm$  S. E. (n=3) in the left graph. For knockdown, siRNA specific for mouse CTCTF or negative control siRNA was transfected 24 h before transfection of the reporter plasmids. Data are presented as the mean  $\pm$  S. E. (n=3) (right).

## S4

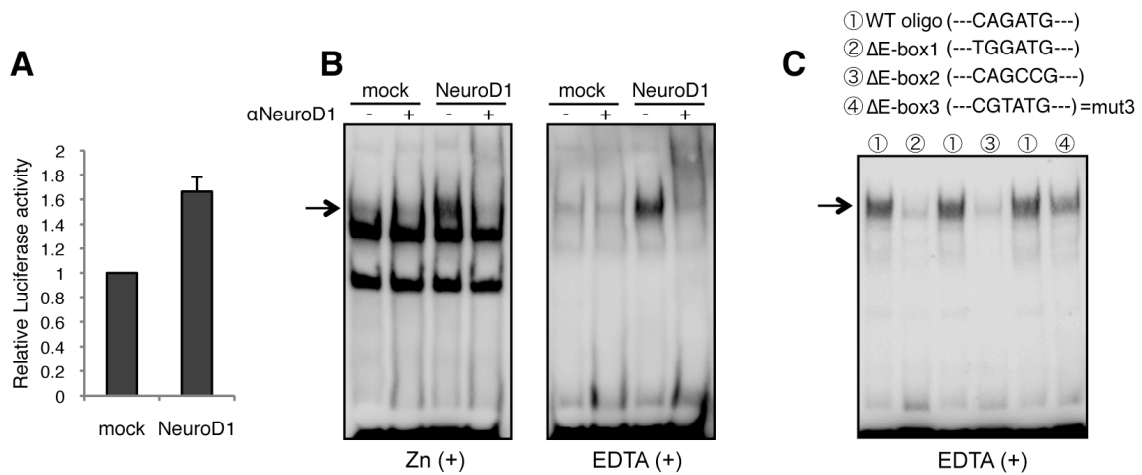

**Fig. S4.** Activation of GnT-IX promoter by NeuroD1 overexpression. (A) Neuro2A cells were transfected with part of the mouse P1 construct (-313 to +606) inserted into a luciferase vector and a NeuroD1 expression vector or pcDNA6 (mock). Luciferase activity was then measured. Relative luciferase activity against mock sample is shown as the mean  $\pm$  S. E. (n=3). (B) Nuclear extracts of Neuro2A cells that had been transfected with pcDNA6 (mock) or NeuroD1 expression plasmid were prepared. EMSA was performed using biotinylated oligonucleotide probe (from -82 to -44 in P1) (left). Binding of NeuroD1 to DNA was validated by addition of anti-NeuroD1 antibody. Right panel shows the result of the same experiment but without divalent cation and with EDTA. An arrow indicates increased signal of NeuroD1 after overexpression. (C) Nuclear extracts of Neuro2A cells that had been transfected with NeuroD1 expression plasmid were prepared. EMSA was performed in the presence of EDTA using three kinds of biotinylated oligonucleotide probe (from -82 to -44 in P1). In  $\Delta$ E-box1, 2 and 3, the E-box sequence was mutated as shown at the top of the panel.  $\Delta$ E-box3 had the same mutation in mut3 in Fig. 3B. An arrow indicates the reduced signal of NeuroD1.

## S5

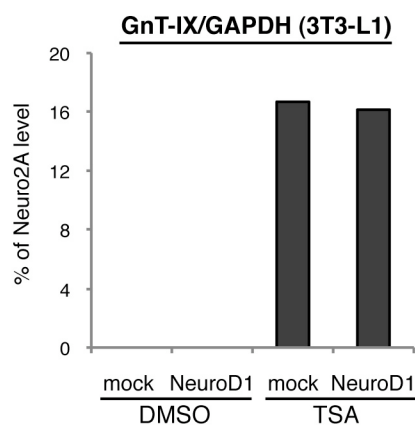

**Fig. S5.** Overexpression of NeuroD1 did not induce GnT-IX expression in 3T3-L1 cells. 3T3-L1 cells were transfected with pcDNA6 (mock) or NeuroD1 expression plasmid. After 24 h, DMSO or TSA (final 0.1  $\mu$ M) was added to the culture medium followed by further 24 h incubation, and then GnT-IX mRNA was quantified by real-time PCR relative to GAPDH mRNA. Expression level is shown as ratio to that in Neuro2A cells.

**S6**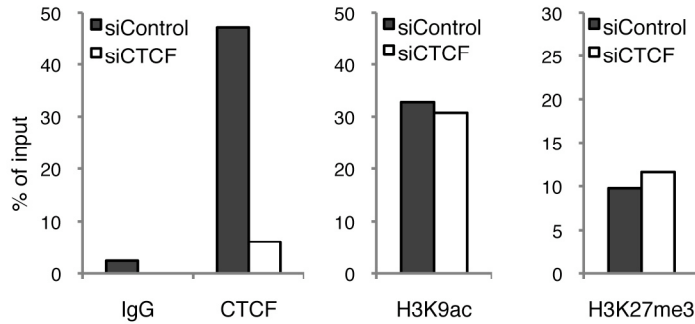

**Fig. S6.** Chromatin state around the GnT-IX core promoter after CTCF-depletion. Neuro2A cells were transfected with control or CTCF-specific siRNA and ChIP experiments were performed using anti-CTCF antibody (left), anti-H3K9ac antibody (middle) or anti-H3K27me3 antibody (right). Precipitated GnT-IX core promoter, including the CTCF binding site, was quantified by real-time PCR. Relative percentage against 1% input sample was shown.

**S7**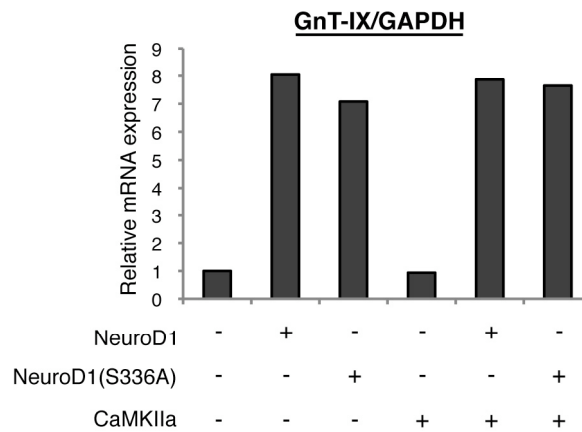

**Fig. S7.** Ability of NeuroD1 to activate GnT-IX is unaltered by CaMKII. NeuroD1, mutant NeuroD1 (serine336 was mutated to alanine), CaMKII $\alpha$ , or combinations thereof were overexpressed in Neuro2A cells and then GnT-IX mRNA was quantified by real-time PCR relative to that of GAPDH. Relative expression levels to that of the mock transfected cells are shown.

## S8 Primers for DNA construction

|                       |                                                                                                                                          |
|-----------------------|------------------------------------------------------------------------------------------------------------------------------------------|
| Promoter1 for cloning | TCAGTGGCTTTACTGGTAGGTTTGACCCAC, CATTGTTCAAACCTGTCTGGGCGAGAAGCC                                                                           |
| pGV/-4085-+606        | AAA <u>ACGCGT</u> CTGGTCCAAGACCCTGAATA (underline: MluI site),<br>TTTCTCGAGA <u>ACTTGTCTGGGCGAGAAGC</u> (primer1) (underline: XhoI site) |
| pGV/-2833-+606        | AAA <u>ACGCGT</u> TAAGAGCGCTGTCTTACCAGG (underline: MluI site), primer1                                                                  |
| pGV/-1803-+606        | AAA <u>ACGCGT</u> CTCTGTAGGTCCTGAGGTCA (underline: MluI site), primer1                                                                   |
| pGV/-793-+606         | AAA <u>ACGCGT</u> CTGGCTAAGGAAATGTCTGA (underline: MluI site), primer1                                                                   |
| pGV/-313-+606         | AAA <u>ACGCGT</u> CCATAGGTACGGAAGCTCTT (underline: MluI site), primer1                                                                   |
| pGV/-106-+606         | AAA <u>ACGCGT</u> TCGCACAGCCCGGGAGGGAG (underline: MluI site), primer1                                                                   |
| pGV/-79-+606          | AAA <u>ACGCGT</u> TAGACTGCGGCCACCAGATGG (underline: MluI site), primer1                                                                  |
| pGV/-53-+606          | AAA <u>ACGCGT</u> TGGCGCCGAGGAAACGCGAGG (underline: MluI site), primer1                                                                  |
| pGV/+1-+606           | AAA <u>ACGCGT</u> TGCGGCGCCTCGGGTTGTAGC (underline: MluI site), primer1                                                                  |
| Promoter2 for cloning | GGTGCCCTGAGATGTTACCTGTGT, GACAAACAGCCTGCAGGGAGAGAGG                                                                                      |
| pGV/promoter2         | AGT <u>GGTACCAAGCAGCTCTTGGGAATCTC</u> (underline: KpnI site),<br>ACTGCTAGCATAGCAAGTCCAGCCCAGC (underline: NheI site)                     |
| pGV/-313-+606 mut1    | GAGCGCAGCGAGACTGCGGCCGTCAGATGCGGCTCAGGCGCCGA<br>and its complementary sequence                                                           |
| pGV/-313-+606 mut2    | CGCAGCGAGACTGCGGCCACCGTATGGCGCTCAGGCGCCGAGGA<br>and its complementary sequence                                                           |
| pGV/-313-+606 mut3    | TGCGGCCACCAGATGGCGCTCGTGCCTGAGGAAACGCGAGGCC<br>and its complementary sequence                                                            |
| Mouse ZEB1            | GAC <u>GAATTC</u> GAGAGGATCATGGCGGATGG (underline: EcoRI site),<br>AGA <u>ACTCCTAAGCTTCATTTGTC</u>                                       |
| Human N-myc           | CCG <u>GAATTC</u> AGGCGAGCCGATGCCGAGCTGCT (underline: EcoRI site),<br>AGCGTCTAGCAAGTCCGAGCGTGTT                                          |
| Human CTCF            | GGCAGGGGAAATGGAAGGTGATGCA, CCGCCATCACCGGTCCATCATGCTG                                                                                     |
| Mouse NeuroD1         | CAACAGGAAGTGGAAACATGACCAA, AACTGACGTGCCTCTAATCGTGAA                                                                                      |
| Mouse NeuroD2         | CTTGACTCCTCTCTGAGGCACCATG, GGCGCGAGGTCTCAGTTATGAAAA                                                                                      |
| Mouse Math2           | AAGAACCATGTTAACTACTACCGTTTG, TTAGAGTGGGAGGTGAATGACCACT                                                                                   |
| Mouse Neurogenin1     | GTCTGCACACTGCAAGATGCCTGC, CCTTACAAAGGCCTAGTGGTATGG                                                                                       |
| Mouse Olig1           | CGCCCCAGATGACTATGCGATTTT, AGCCAGCCCTCACTTGAGAACTGG                                                                                       |
| Mouse CaMKIIa         | CCCAGTGCCAGGATGGCTACCATCA, GGCCTGGTCTTCAATGCGGCAGGA<br>GATCCCATAGACAACATTATGGCTTTCGATAGCCATTCGCATCA<br>and its complementary sequence    |

### Primers for RT-PCR

|                    |                                                      |
|--------------------|------------------------------------------------------|
| Mouse GnT-IX       | GAAGATGCCTGGTCAACCTG, GGCCAGCATATCCATGCGCT (primer3) |
| Mouse GnT-Vb       | ACCCTGCTCCTCTCTCCCTG, primer3                        |
| Mouse GAPDH        | TCCACCACCTGTTGCTGTA, ACCACAGTCCATGCCATCAC            |
| Human GnT-IX       | AGAAGATGCCTGGTCAACCT, AGCGATGTCGGAGACGTTCT (primer4) |
| Human GnT-Vb       | ATGGCCCTTCTGCCCTCT, primer4                          |
| Human beta-actin   | TGGCACCCAGCACAAATGAA, CTAAGTCATAGTCCGCCTAGAAGCA      |
| Mouse ST6Gal-I     | GCATAACGGAGACCAAGCGT, TGTGGAGCTTGGCACAGCTG           |
| Mouse Beta4Gal-T-I | CCCACCACCACTGGACTGTT, GTCGAGTTGCTGGCGCTGAA           |
| Mouse GlcAT-P      | GCGACACTGGCCTCACTAC, ACACCCTTCTTGTGCTGCGC            |
| Mouse ST8Sia-IV    | GGCTCCACCATCTTCCAACA, ACAGGTCTTAAACCTGCGG            |

### Primers and probes for ChIP analysis

|                  |                                            |
|------------------|--------------------------------------------|
| GnT-IX primer    | TAGGAAGTTGCATGGTCCAG, CCGGGCTCCCAGCGGGCGCT |
| GnT-IX probe     | 5'-FAM-TCAGAGGGAACAATGCGGCG-MGB-3'         |
| ST6Gal-I primer  | GAGGCAGCATTGGGCTTCC, GAGGACGCTTGGTCTCCGTT  |
| ST6Gal-I probe   | 5'-FAM-AGCAGGCACCTTTAACCTTG-MGB-3'         |
| β4Gal-T-I primer | CAGGTTCCGCGAACAGCCTT, CCACAGCGATCGAAGGAGGG |
| β4Gal-T-I probe  | 5'-FAM-CTGATCTCTCAAAGTCCCG-MGB-3'          |
| GlcAT-P primer   | AGAGCAGGGAGGTGATACCA, CGCGGCTGTGACAGCGCCT  |
| GlcAT-P probe    | 5'-FAM-AGGTTGGTACGGACCGCGAG-MGB-3'         |
| ST8Sia-IV primer | CCGAGCTACAACGACTCTC, CCCTGGGGCTCAGGTTTCTT  |
| ST8Sia-IV probe  | 5'-FAM-TTATCGTTCCCTGCTACGG-MGB-3'          |

Fig. S8. Primers used for plasmid construction, RT-PCR and ChIP analyses.
